# Supplementary material
Source: PubMed Central journal article supplement (PMC3329499)
Supplement: epi-7-29-s1.pdf [file epi-7-29-s1.pdf]

**Supplemental material to:**

Israel Ausin, Maxim V.C. Greenberg, Carey Fei Li and Steven E. Jacobsen. *Epigenetics* 2012; 7(1); <http://dx.doi.org/10.4161/epi.7.1.18782>  
<http://www.landesbioscience.com/journals/epigenetics/article/18782>

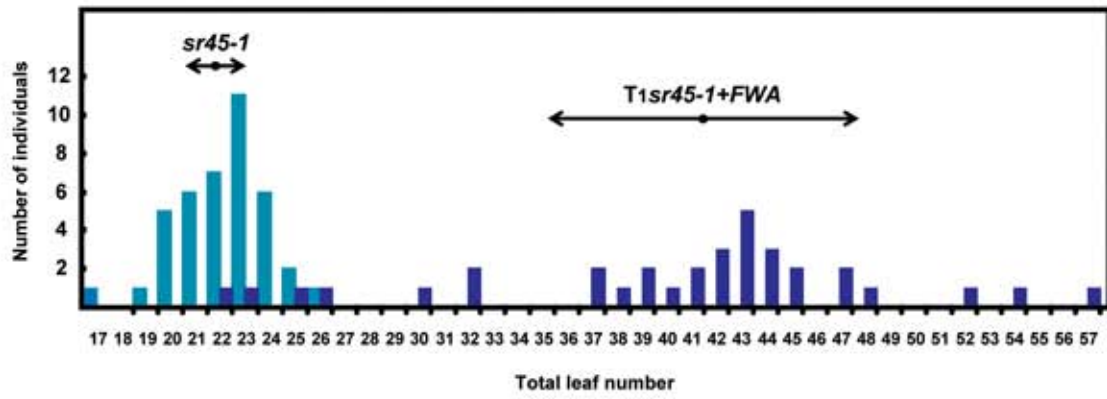

Supplementary Figure 1. Flowering time distribution of *sr45-1* versus *sr45-1+FWA*

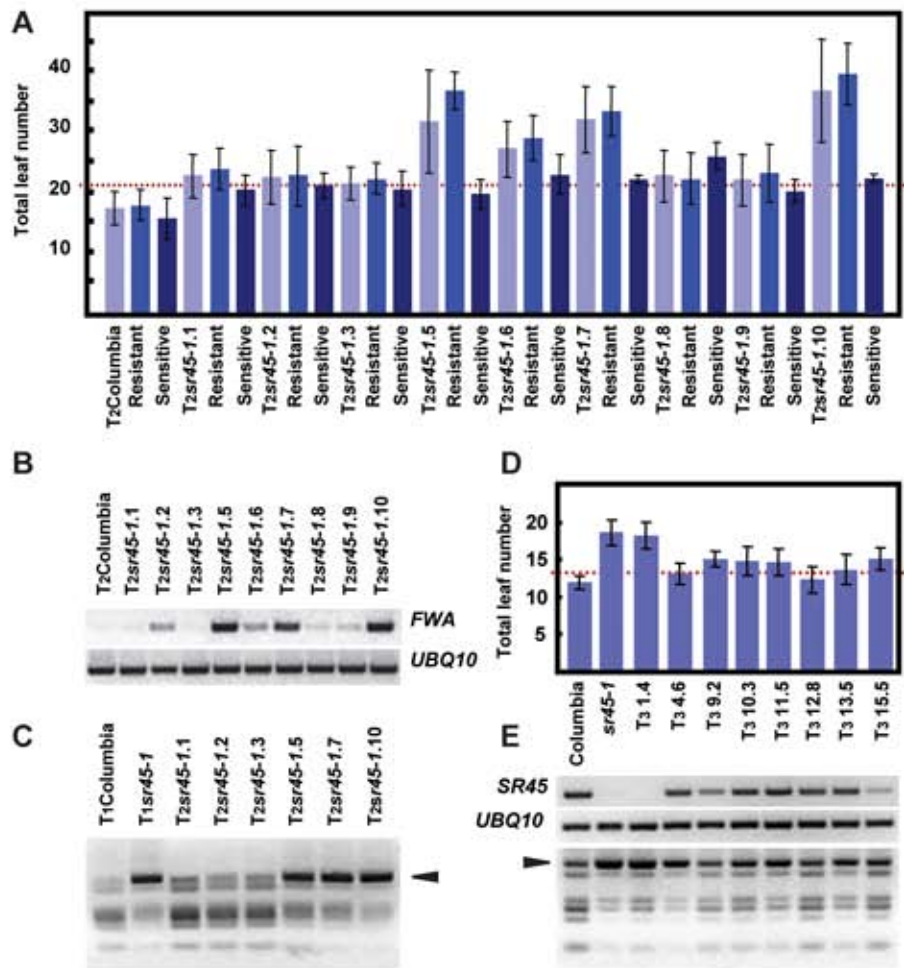

**Supplementary Figure 2. Confirmation of *sr45-1* de novo phenotype.** (A) Flowering time of randomly selected T<sub>2</sub> *sr45-1*+*FWA* transformants. *FWA* construct has a Basta® resistance gene as a selection marker that allows testing for the presence of *FWA* construct. Red-dotted line depicts the flowering time of untransformed *sr45-1* mutants grown under the same conditions. (B) RT-PCR showing *FWA* expression of a selection of the above-mentioned lines. *UBQ10* expression is shown as a loading control. (C) Bisulfite cutting assay, showing *FWA* methylation status in the above-mentioned lines. Genomic DNA is digested with *Bgl*III to destroy the endogenous *FWA* gene before bisulfite treatment. DNA methylation of transgenic *FWA* was assayed by PCR from bisulfite-treated DNA followed by *Cla*I digestion. CG methylation protects the *Cla*I site from bisulfite conversion. Black arrow indicates the unmethylated size. (D) Flowering time of homozygous T<sub>3</sub> *sr45-1*+*SR45* complemented lines after *FWA* transformation. (E) RT-PCR and bisulfite cutting assay showing *SR45* expression and partial restoration of methylation at *FWA*. *UBQ10* expression is shown as a loading control.

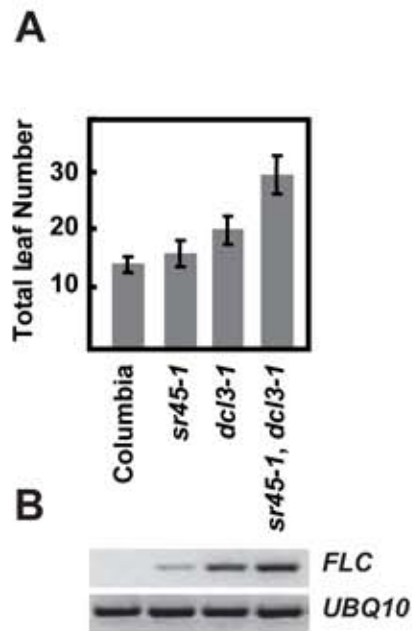

**Supplementary Figure 3. *FLC* de-repression enhancement. (A)** Flowering time of Columbia, *sr45-1*, *dcl3-1* and *sr45-1, dcl3-1* double mutant. **(B)** RT-PCR showing the expression of *FLC* in the above-mentioned lines. *UBQ10* expression is shown as a loading control.

**Supplementary Table 1: A list of known or putative spliceosome factors screened in this study.**

| <b>Line</b> | <b>Insertion</b>    | <b>AGI</b> | <b>Annotation</b>                                                                              |
|-------------|---------------------|------------|------------------------------------------------------------------------------------------------|
| 99          | SALK_034824         | At5g37370  | pre-mRNA splicing factor PRP38 family protein (SRL1)                                           |
| 114         | SALK_040864         | At1g55310  | SC35-like splicing factor, 33 kD (SCL33)                                                       |
| 118         | SALK_041849         | At3g13570  | SC35-like splicing factor, 30a kD (SCL30a)                                                     |
| 159         | SALK_059236         | At2g33440  | splicing factor family protein                                                                 |
| 167         | SALK_062177         | At5g51300  | splicing factor-related                                                                        |
| 288         | SALK_125057         | At1g03140  | splicing factor Prp18 family protein                                                           |
| 299         | SALK_130919         | At3g45950  | splicing factor-related                                                                        |
| 336         | SALK_147534         | At3g55930  | RNA splicing factor-related                                                                    |
| 357         | SALK_004132         | At1g16610  | arginine/serine-rich protein, putative (SR45)                                                  |
| 367         | SALK_007933         | At4g03430  | pre-mRNA splicing factor-related                                                               |
| 453         | SALK_035759         | At2g29210  | splicing factor PWI domain-containing protein                                                  |
| 518         | SALK_055030         | At1g60200  | splicing factor PWI domain-containing protein / RNA recognition motif (RRM)-containing protein |
| 549         | SALK_063749         | At4g38780  | splicing factor, putative                                                                      |
| 562         | SALK_069027         | At5g37370  | pre-mRNA splicing factor PRP38 family protein (SRL1)                                           |
| 589         | SALK_085295         | At4g38780  | splicing factor, putative                                                                      |
| 591         | SALK_086134         | At3g06455  | splicing factor-related                                                                        |
| 620         | SALK_106715         | At1g60200  | splicing factor PWI domain-containing protein / RNA recognition motif (RRM)-containing protein |
| 640         | SALK_121879         | At3g25440  | group II intron splicing factor CRS1-related                                                   |
| 662         | SALK_132986         | At1g09140  | SF2/ASF-like splicing modulator (SRP30)                                                        |
| 666         | SALK_135024         | At2g18510  | pre-mRNA splicing factor, putative                                                             |
| 667         | SALK_135314         | At2g29210  | splicing factor PWI domain-containing protein                                                  |
| 668         | SALK_135626         | At5g64270  | splicing factor, putative                                                                      |
| 704         | SALK_149863         | At2g33440  | splicing factor family protein                                                                 |
| 864         | WiscDsLox289_292D17 | At1g80070  | splicing factor, putative                                                                      |
| 880         | WiscDsLox384B10     | At5g18810  | SC35-like splicing factor, 28 kD (SCL28)                                                       |
| 898         | WiscDsLox246B03     | At5g64200  | arginine/serine-rich splicing factor SC35                                                      |
| 899         | WiscDsLox247E04     | At4g02430  | pre-mRNA splicing factor, putative / SR1 protein, putative                                     |
| 914         | WiscDsLox382G12     | At4g25500  | arginine/serine-rich splicing factor RSP40 (RSP40)                                             |
| 916         | WiscDsLox384G9      | At4g13070  | group II intron splicing factor CRS1-related                                                   |

**Supplementary Table 2. Primers used in this study**

| Primer                           | Sequence 5' to 3'                           |
|----------------------------------|---------------------------------------------|
| 5S siRNA Probe                   | ATGCCAAGTTTGGCCTCACGGTCT                    |
| AGO4 RT-PCR and Northern         | CAGTGCCATTTCTGTTGTTGC                       |
| AGO4 RT-PCR and Northern         | TGGCGACGTTGTCTTTGAGT                        |
| <i>AtSN1</i> Chop-qPCR           | TTTAAACATAAGAAGAAGTTCCTTTTTTCATCTAC         |
| <i>AtSN1</i> Chop-qPCR           | ACTTAATTAGCACTCAAATTAACAAAATAAGT            |
| <i>AtSN1</i> siRNA Probe         | ACCAACGTGTTGTTGGCCCAGTGGTAAATCTCTCAGATAGAGG |
| <i>FLC</i> RT-PCR                | TGTGGATAGCAAGCTTGTGG                        |
| <i>FLC</i> RT-PCR                | TAGTCACGGAGAGGGCAGTC                        |
| <i>FWA</i> Bisulfite             | GGTTTTATATTAATATTAAGAGTTATGGGTYGAAGTTT      |
| <i>FWA</i> Bisulfite             | AACCAAATCATTCTCTAAACAAAATATAAAAAAATC        |
| <i>FWA</i> Bisulfite Cutting     | GGTTTTATTTAATGTAAATATGTATTTGATGTATT         |
| <i>FWA</i> Bisulfite Cutting     | CTAAATTAATATAACRTAATATAACATTATA             |
| <i>FWA</i> RT-PCR                | TAGTCCAGGATTGTCTGCAAAAGG                    |
| <i>FWA</i> RT-PCR                | CCATTATTAACGATTTTCAGAAGAGAGA                |
| <i>MEA-ISR</i> Bisulfite         | AAAGTGGTTGTAGTTTATGAAAGGTTTTAT              |
| <i>MEA-ISR</i> Bisulfite         | CTTAAAAAATTTCAACTCATTTTTAAAAAA              |
| <i>MEA-ISR</i> Southern Probe    | AAACCTTTCGTAAGCTACAGCCACTTTGTT              |
| <i>MEA-ISR</i> Southern Probe    | TCGGATTGGTTCTTCCTACCTCTTTACCTT              |
| <i>miR159</i> miRNA Probe        | TAGAGCTCCCTTCAATCCAAA                       |
| <i>miR163</i> miRNA Probe        | ATCGAAGTTGGAAGTCCTCTTCAA                    |
| <i>REP12</i> Southern probe      | TCCTCTTCTCCCTCCTCTCCC                       |
| <i>REP12</i> Southern probe      | TCCCACCAAGAAGCACACGC                        |
| <i>siR02</i> siRNA Probe         | GTTGACCAGTCCGCCAGCCGAT                      |
| <i>Ta3</i> Southern Probe        | GATCTATCTGGCCCCAGACGTAGATCTAA               |
| <i>Ta3</i> Southern Probe        | CCGGCAATCTACTATATGAGATCTTTACAA              |
| <i>UBQ10</i> RT-PCR and Northern | GATCTTTGCCGGAAAACAATTGGAGG                  |
| <i>UBQ10</i> RT-PCR and Northern | CGACTTGTCAATTAGAAAGAAAGAGAT                 |
